# Supplementary material for: Unusual C–H⋯Ni anagostic interactions in new homoleptic Ni(ii) dithio complexes
Source: Royal Society of Chemistry journal article supplement (doi:10.1039/c3ce27096c), 2013-01-01
Supplement: c3ce27096c.pdf [file c3ce27096c.pdf]

Electronic Supplementary Information for:

## Functionalization on Dithiocarbamate and Xanthate Units Resulting in Unusual C–H···Ni Anagostic Intermolecular Interactions in their Homoleptic Ni(II) Complexes: Syntheses, Crystal Structures and Conducting Properties

Gunjan Rajput<sup>a</sup>, Vikram Singh<sup>a</sup>, Ajit. N. Gupta<sup>a</sup>, Manoj Kumar Yadav<sup>a</sup>, Vinod Kumar<sup>a</sup>, Santosh Kumar Singh<sup>a</sup>, Akhilesh Prasad<sup>c</sup>, Michael G. B. Drew<sup>b</sup> and Nanhai Singh<sup>\*a</sup>

<sup>a</sup>Department of Chemistry, Faculty of Science, Banaras Hindu University, Varanasi 221005, India. Fax: +91-542-2386127

E-mail: [nsingh@bhu.ac.in](mailto:nsingh@bhu.ac.in), [nsinghbhu@gmail.com](mailto:nsinghbhu@gmail.com)

<sup>b</sup>Department of Chemistry, University of Reading, Whiteknights, Reading, RG6 6AD (U.K)

<sup>c</sup>Department of Chemistry, S.M.M. Town P.G. College, Ballia-277001, India.

### 1. Electronic absorption spectra of the Ni(II) Metal Complexes (1–6)

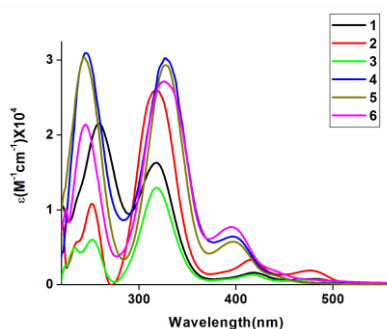

Fig. S1. Absorption spectra of the complexes (1-6) in  $10^{-4}$  M dichloromethane solution.

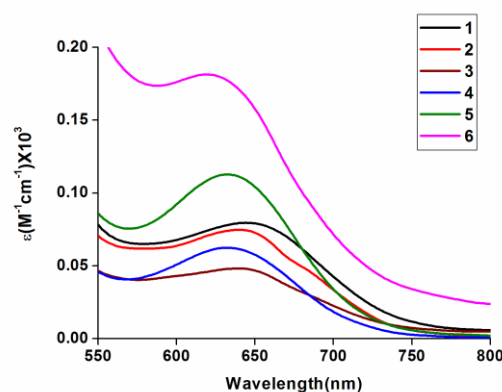

Fig. S2. Absorption spectra of the complexes (1-6) showing weak d-d transitions.

## 2. ORTEP Diagram for Ni(II) Metal Complexes 2, 3, 5 and 6

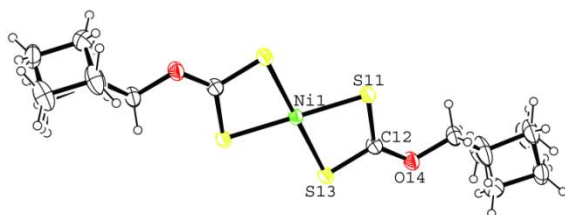

**Fig. S3.** The centrosymmetric structure of **2** with thermal ellipsoid at 30% probability level

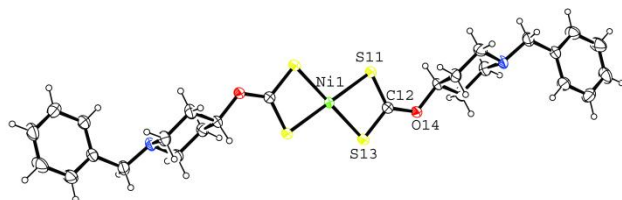

**Fig. S4.** The centrosymmetric structure of **3** with thermal ellipsoid at 30% probability level

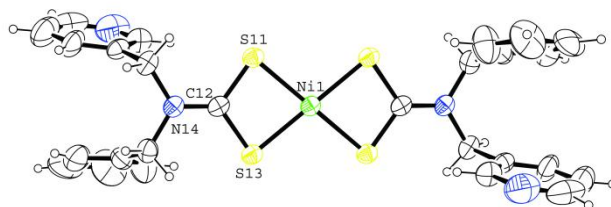

**Fig. S5.** The centrosymmetric structure of **5** with thermal ellipsoid at 30% probability level

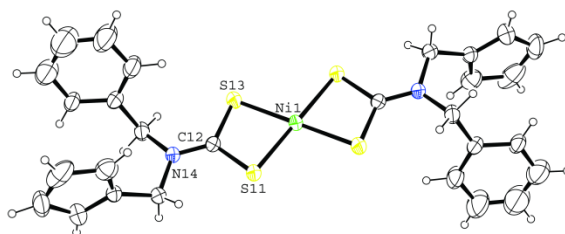

**Fig. S6.** The centrosymmetric structure of **6** with thermal ellipsoid at 30% probability level

### 3. Packing diagram for complexes 1 and 2

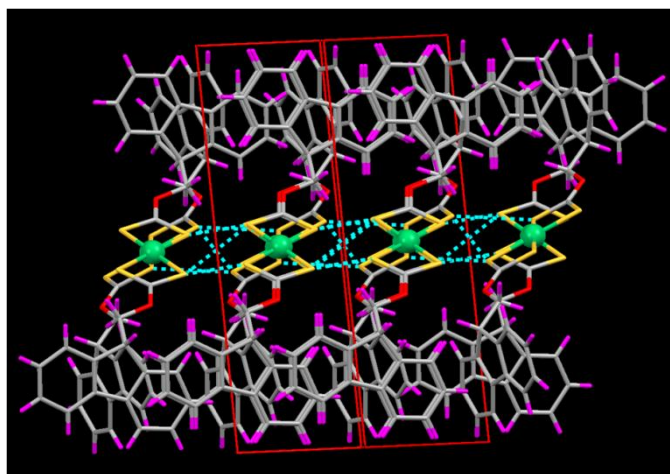

**Fig. S7.** Packing diagram for complex **1** showing supramolecular framework through intermolecular S...S interactions.

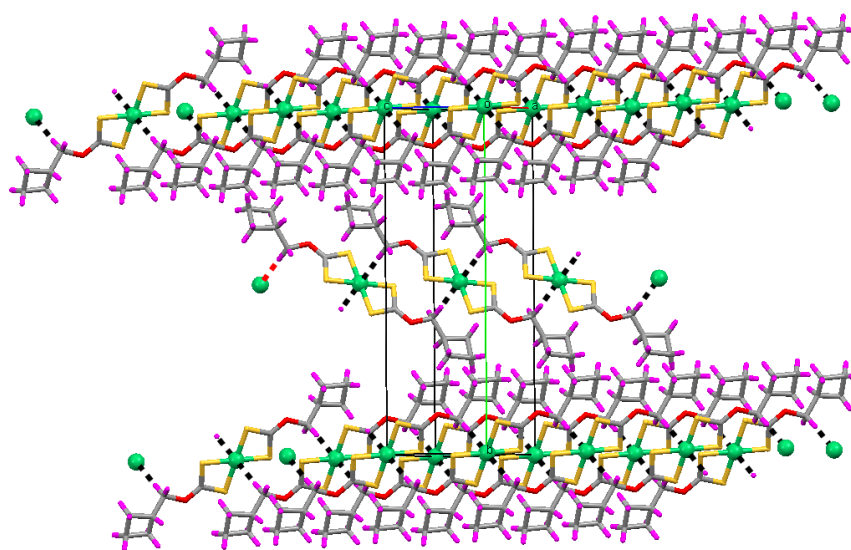

**Fig. S8.** Packing diagram for complex **2** along axis 'c', depicting favourable orientation of methylene protons in crystal packing for Ni...H-C intermolecular anagostic interactions.
